# Supplementary material for: Sex-Related Disparities in the Prevalence of Depression among Patients Hospitalized with Type 2 Diabetes Mellitus in Spain, 2011–2020
Source: MDPI journal article supplement (doi:10.3390/jcm11216260), 2022-10-24
Supplement: s1 [file s1]

**Table S1.** Diagnosis analyzed with their corresponding ICD-9-CM and ICD10 codes.

| DIAGNOSIS                   | ICD-9-CM codes                                                                                                                                   | ICD-10 codes                                                                                                                                                                                  |
|-----------------------------|--------------------------------------------------------------------------------------------------------------------------------------------------|-----------------------------------------------------------------------------------------------------------------------------------------------------------------------------------------------|
| Type 2 diabetes             | 250.x0; 250.x2                                                                                                                                   | E11.x                                                                                                                                                                                         |
| Depression                  | 300.4; 301.12; 309.1; 311                                                                                                                        | F34.1, F43.21; F32.9                                                                                                                                                                          |
| Acute Myocardial Infarction | 410, 412                                                                                                                                         | I21, I22, I252                                                                                                                                                                                |
| Congestive Heart Failure    | 398.91,402.01,402.11,402.91,404.01,<br>404.03,404.11,404.13,404.91,404.93,425.4–425.9, 428.x                                                     | I50                                                                                                                                                                                           |
| Peripheral Vascular Disease | 0.93.0,473.3,440.x,441.x,443.1–443.9,447.1,557.1,557.9,V43.4                                                                                     | I71, I790, I739, R02, Z958, Z959                                                                                                                                                              |
| Cerebrovascular Disease     | 362.34, 430.x–438.x                                                                                                                              | I60, I61, I62, I63, I65, I66,G450, G451, G452, G458, G459, G46,<br>I64, G454, I670, I671, I672, I674, I675, I676, I677 I678, I679, I681,<br>I682, I688, I69                                   |
| COPD                        | 416.8, 416.9, 490.x–505.x, 506.4, 508.1, 508.8                                                                                                   | I27.8, I27.9, J40.x–J47.x, J60.x–J67.x, J68.4, J70.1, J70.3                                                                                                                                   |
| Renal Disease               | 403.01, 403.11, 403.91, 404.02, 404.03, 404.12, 404.13, 404.92,<br>404.93, 582.x, 583.0 - 583.7, 585.x, 586.x, 588.0, V42.0, V45.1,<br>V56.x     | I12.0, I13.1, N03.2–N03.7, N05.2–<br>N05.7, N18.x, N19.x, N25.0, Z49.0–<br>Z49.2, Z94.0, Z99.2                                                                                                |
| Liver Disease               | 070.22, 070.23, 070.32, 070.33, 070.44, 070.54, 070.6, 070.9, 570.x,<br>571.x, 573.3, 573.4, 573.8, 573.9, V42.7; 456.0 - 456.2, 572.2–<br>572.8 | B18.x, K70.0 - K70.3, K70.9, K71.3 - K71.5, K71.7, K73.x, K74.x,<br>K76.0, K76.2 - K76.4, K76.8, K76.9, Z94.4, I85.0, I85.9, I86.4,<br>I98.2, K70.4, K71.1, K72.1, K72.9, K76.5, K76.6, K76.7 |
| Cancer                      | 140.x–172.x, 174.x–195.8, 200.x–208.x, 238.6, 196.x–199.x                                                                                        | C00.x - C26.x, C30.x - C34.x, C37.x - C41.x, C43.x, C45.x -<br>C58.x, C60.x - C76.x, C81.x - C85.x, C88.x, C90.x - C97.x, C77.x<br>- C80.x                                                    |
| Obesity                     | 278.0x, 649.1x ,V85.3, V85.4                                                                                                                     | E66.09, E66.1 E66.3, E66.8 E66.9 E66.2, E66.01                                                                                                                                                |
| Pneumonia                   | 997.31, 507.xx, 480.xx-488.xx                                                                                                                    | J12 to J18, J12-J18, J95.851                                                                                                                                                                  |

**Table S2.** Multivariate analysis of the factors associated with in-hospital mortality in men with type 2 diabetes and selected concomitant conditions in Spain, 2011-2020.

|                  | Acute myocardial infarction | Congestive heart failure | Peripheral vascular disease | Cerebrovascular disease | COPD            | Renal disease   | Liver disease   | Cancer          | Obesity         | Pneumonia       |
|------------------|-----------------------------|--------------------------|-----------------------------|-------------------------|-----------------|-----------------|-----------------|-----------------|-----------------|-----------------|
|                  | OR(95%CI)                   | OR(95%CI)                | OR(95%CI)                   | OR(95%CI)               | OR(95%CI)       | OR(95%CI)       | OR(95%CI)       | OR(95%CI)       | OR(95%CI)       | OR(95%CI)       |
| Year 2011        | 1                           | 1                        | 1                           | 1                       | 1               | 1               | 1               | 1               | 1               | 1               |
| Year 2012        | 0.99(0.92-1.05)             | 0.96(0.92-1)             | 1(0.94-1.06)                | 0.95(0.91-1)            | 0.96(0.93-1)    | 0.95(0.91-0.99) | 0.95(0.89-1.01) | 0.96(0.93-1)    | 0.97(0.89-1.06) | 0.97(0.93-1.02) |
| Year 2013        | 0.9(0.84-0.96)              | 0.89(0.86-0.93)          | 0.91(0.86-0.97)             | 0.87(0.83-0.92)         | 0.9(0.87-0.94)  | 0.86(0.83-0.9)  | 0.86(0.81-0.91) | 0.92(0.89-0.95) | 0.8(0.74-0.88)  | 0.92(0.88-0.97) |
| Year 2014        | 0.89(0.84-0.95)             | 0.89(0.85-0.92)          | 0.89(0.84-0.95)             | 0.88(0.84-0.93)         | 0.87(0.84-0.9)  | 0.89(0.85-0.92) | 0.84(0.79-0.89) | 0.88(0.85-0.91) | 0.82(0.75-0.89) | 0.9(0.86-0.95)  |
| Year 2015        | 0.93(0.87-0.99)             | 0.89(0.86-0.93)          | 0.9(0.85-0.95)              | 0.89(0.84-0.93)         | 0.91(0.87-0.94) | 0.9(0.86-0.93)  | 0.85(0.8-0.9)   | 0.89(0.86-0.92) | 0.89(0.82-0.96) | 0.9(0.86-0.94)  |
| Year 2016        | 0.84(0.79-0.89)             | 0.88(0.85-0.92)          | 0.88(0.83-0.93)             | 0.88(0.83-0.92)         | 0.89(0.86-0.93) | 0.89(0.85-0.92) | 0.78(0.74-0.83) | 0.9(0.87-0.94)  | 0.91(0.84-0.98) | 0.69(0.65-0.73) |
| Year 2017        | 0.81(0.76-0.86)             | 0.87(0.84-0.91)          | 0.86(0.81-0.91)             | 0.87(0.83-0.92)         | 0.87(0.84-0.91) | 0.89(0.85-0.92) | 0.77(0.73-0.82) | 0.89(0.86-0.92) | 0.94(0.88-1.02) | 0.67(0.64-0.71) |
| Year 2018        | 0.78(0.74-0.83)             | 0.88(0.84-0.91)          | 0.88(0.83-0.93)             | 0.9(0.86-0.94)          | 0.86(0.83-0.89) | 0.86(0.83-0.9)  | 0.73(0.69-0.78) | 0.85(0.82-0.88) | 0.86(0.8-0.93)  | 0.66(0.62-0.69) |
| Year 2019        | 0.74(0.7-0.79)              | 0.84(0.81-0.87)          | 0.82(0.77-0.87)             | 0.83(0.79-0.87)         | 0.82(0.79-0.85) | 0.83(0.8-0.86)  | 0.67(0.63-0.71) | 0.83(0.81-0.86) | 0.83(0.77-0.9)  | 0.61(0.58-0.64) |
| Year 2020        | 0.94(0.89-1)                | 1.08(1.04-1.12)          | 1.05(0.99-1.11)             | 1.01(0.97-1.06)         | 1.09(1.05-1.13) | 1.09(1.05-1.13) | 0.82(0.77-0.86) | 0.87(0.84-0.91) | 1.25(1.17-1.35) | 0.83(0.78-0.87) |
| Age, 35-59 years | 1                           | 1                        | 1                           | 1                       | 1               | 1               | 1               | 1               | 1               | 1               |
| Age, 60-69 years | 1.5(1.41-1.6)               | 1.24(1.18-1.3)           | 1.41(1.33-1.51)             | 1.25(1.18-1.32)         | 1.4(1.33-1.47)  | 1.4(1.33-1.48)  | 1.28(1.23-1.33) | 1.02(0.99-1.06) | 1.36(1.28-1.44) | 1.17(1.1-1.24)  |
| Age, 70-79 years | 2.23(2.1-2.37)              | 1.74(1.67-1.82)          | 2.08(1.95-2.21)             | 1.74(1.65-1.83)         | 1.91(1.82-2.01) | 2.05(1.96-2.16) | 1.65(1.59-1.71) | 1.18(1.15-1.22) | 1.93(1.83-2.04) | 1.43(1.35-1.51) |
| Age, ≥80 year    | 4.13(3.89-4.38)             | 3.04(2.91-3.18)          | 3.89(3.66-4.14)             | 2.99(2.84-3.15)         | 3.34(3.19-3.5)  | 3.84(3.67-4.03) | 2.55(2.44-2.66) | 1.74(1.68-1.79) | 3.71(3.52-3.92) | 2.3(2.18-2.42)  |
| CCI              | 1.25(1.25-1.26)             | 1.2(1.19-1.2)            | 1.27(1.26-1.28)             | 1.18(1.18-1.19)         | 1.28(1.28-1.29) | 1.25(1.25-1.26) | 1.32(1.31-1.32) | 1.3(1.29-1.3)   | 1.32(1.32-1.33) | 1.18(1.17-1.18) |
| Depression       | 0.99(0.9-1.08)              | 0.94(0.89-1)             | 0.94(0.87-1.02)             | 0.81(0.76-0.87)         | 0.98(0.93-1.03) | 0.9(0.85-0.95)  | 0.83(0.77-0.91) | 1.03(0.98-1.08) | 0.91(0.83-1)    | 0.95(0.89-1.01) |

COPD: chronic obstructive pulmonary disease. CCI: Charlson Comorbidity Index. Excluding diabetes and the condition analysed. OR: Odds Ratio.CI: Confidence interval.

**Table S3.** Multivariate analysis of the factors associated with in-hospital mortality in women with type 2 diabetes and selected concomitant conditions in Spain, 2011-2020.

|                  | Acute myocardial infarction | Congestive heart failure | Peripheral vascular disease | Cerebrovascular disease | COPD            | Renal disease   | Liver disease   | Cancer          | Obesity         | Pneumonia       |
|------------------|-----------------------------|--------------------------|-----------------------------|-------------------------|-----------------|-----------------|-----------------|-----------------|-----------------|-----------------|
|                  | OR(95%CI)                   | OR(95%CI)                | OR(95%CI)                   | OR(95%CI)               | OR(95%CI)       | OR(95%CI)       | OR(95%CI)       | OR(95%CI)       | OR(95%CI)       | OR(95%CI)       |
| Year 2011        | 1                           | 1                        | 1                           | 1                       | 1               | 1               | 1               | 1               | 1               | 1               |
| Year 2012        | 1(0.92-1.08)                | 1.01(0.97-1.05)          | 1.02(0.93-1.11)             | 1.02(0.93-1.11)         | 0.99(0.93-1.05) | 0.99(0.94-1.03) | 0.99(0.91-1.08) | 0.93(0.88-0.98) | 0.98(0.92-1.04) | 0.98(0.93-1.04) |
| Year 2013        | 0.96(0.89-1.04)             | 0.96(0.93-1)             | 0.94(0.87-1.03)             | 0.94(0.87-1.03)         | 0.92(0.87-0.98) | 0.93(0.88-0.97) | 0.93(0.86-1.02) | 0.89(0.85-0.94) | 0.91(0.85-0.97) | 0.93(0.88-0.98) |
| Year 2014        | 0.9(0.83-0.98)              | 0.94(0.9-0.97)           | 0.97(0.89-1.06)             | 0.97(0.89-1.06)         | 0.95(0.89-1)    | 0.89(0.85-0.93) | 0.93(0.86-1.01) | 0.89(0.85-0.94) | 0.88(0.82-0.93) | 0.9(0.86-0.96)  |
| Year 2015        | 0.95(0.88-1.04)             | 0.97(0.93-1.01)          | 0.96(0.88-1.04)             | 0.96(0.88-1.04)         | 0.93(0.88-0.99) | 0.92(0.88-0.96) | 0.91(0.84-0.99) | 0.88(0.83-0.92) | 0.89(0.84-0.95) | 0.87(0.82-0.92) |
| Year 2016        | 0.84(0.78-0.91)             | 0.95(0.91-0.99)          | 0.9(0.82-0.98)              | 0.9(0.82-0.98)          | 0.89(0.84-0.95) | 0.92(0.88-0.96) | 0.79(0.73-0.87) | 0.89(0.85-0.94) | 0.96(0.91-1.02) | 0.67(0.62-0.71) |
| Year 2017        | 0.87(0.81-0.94)             | 0.98(0.94-1.02)          | 0.95(0.87-1.03)             | 0.95(0.87-1.03)         | 0.88(0.83-0.93) | 0.95(0.91-0.99) | 0.75(0.69-0.82) | 0.91(0.87-0.96) | 0.99(0.93-1.05) | 0.65(0.61-0.69) |
| Year 2018        | 0.83(0.77-0.89)             | 0.96(0.92-0.99)          | 0.95(0.87-1.04)             | 0.95(0.87-1.04)         | 0.86(0.81-0.91) | 0.92(0.88-0.96) | 0.74(0.68-0.81) | 0.87(0.83-0.92) | 0.95(0.9-1.01)  | 0.59(0.56-0.63) |
| Year 2019        | 0.77(0.72-0.83)             | 0.94(0.9-0.97)           | 0.85(0.79-0.93)             | 0.85(0.79-0.93)         | 0.86(0.81-0.91) | 0.88(0.85-0.92) | 0.68(0.63-0.74) | 0.86(0.81-0.9)  | 0.9(0.84-0.95)  | 0.57(0.53-0.6)  |
| Year 2020        | 0.91(0.85-0.98)             | 1.17(1.12-1.21)          | 1.01(0.93-1.1)              | 1.01(0.93-1.1)          | 1.13(1.06-1.2)  | 1.12(1.08-1.17) | 0.83(0.77-0.9)  | 0.9(0.86-0.95)  | 1.26(1.19-1.33) | 0.76(0.72-0.81) |
| Age, 35-59 years | 1                           | 1                        | 1                           | 1                       | 1               | 1               | 1               | 1               | 1               | 1               |
| Age, 60-69 years | 1.76(1.53-2.03)             | 1.13(1.04-1.23)          | 1.78(1.53-2.06)             | 1.78(1.53-2.06)         | 1.48(1.36-1.62) | 1.4(1.28-1.52)  | 1.47(1.36-1.6)  | 1.13(1.07-1.19) | 1.67(1.55-1.79) | 1.25(1.12-1.39) |
| Age, 70-79 years | 2.73(2.39-3.11)             | 1.59(1.47-1.71)          | 2.71(2.36-3.11)             | 2.71(2.36-3.11)         | 2.24(2.07-2.43) | 2.11(1.95-2.29) | 2.04(1.9-2.19)  | 1.45(1.39-1.52) | 2.62(2.46-2.79) | 1.84(1.67-2.02) |
| Age, ≥80 year    | 5.42(4.77-6.17)             | 2.94(2.73-3.16)          | 5.52(4.83-6.32)             | 5.52(4.83-6.32)         | 4.42(4.09-4.77) | 4.05(3.75-4.37) | 3.51(3.27-3.77) | 2.36(2.25-2.47) | 5.1(4.8-5.43)   | 3.32(3.03-3.63) |
| CCI              | 1.2(1.18-1.21)              | 1.19(1.18-1.19)          | 1.21(1.2-1.22)              | 1.21(1.2-1.22)          | 1.31(1.3-1.32)  | 1.25(1.25-1.26) | 1.35(1.34-1.37) | 1.28(1.28-1.29) | 1.31(1.3-1.32)  | 1.17(1.16-1.18) |
| Depression       | 0.85(0.79-0.91)             | 0.77(0.75-0.8)           | 0.82(0.76-0.89)             | 0.82(0.76-0.89)         | 0.77(0.73-0.81) | 0.77(0.75-0.8)  | 0.77(0.72-0.82) | 0.97(0.93-1.01) | 0.8(0.77-0.84)  | 0.75(0.71-0.79) |

COPD: chronic obstructive pulmonary disease. Liver disease: moderate or severe. Cancer: any malignancy, including metastatic solid tumour.

CCI: Charlson Comorbidity Index. Excluding diabetes and the condition analysed. OR: Odds Ratio.CI: Confidence interval.
